# Supplementary material for: Conceptualisation and Measurement of Social Cohesion within the Sport and Physical Activity Context: A Scoping Review
Source: MDPI journal article supplement (doi:10.3390/sports11120231), 2023-11-22
Supplement: s1 [file s1]

Supplementary Table S1. Overview of measurement tools and their social cohesion items.

| Authors (Year)        | Measurement Items                                                                                                                                                                                                                                                                                                                                                                                                                                                                                                                                                                                                                                                             |
|-----------------------|-------------------------------------------------------------------------------------------------------------------------------------------------------------------------------------------------------------------------------------------------------------------------------------------------------------------------------------------------------------------------------------------------------------------------------------------------------------------------------------------------------------------------------------------------------------------------------------------------------------------------------------------------------------------------------|
| Sampson et al. (1997) | <ul style="list-style-type: none"> <li>• People in this neighbourhood can be trusted</li> <li>• This is a close-knit neighbourhood</li> <li>• People around here are willing to help their neighbours</li> <li>• People in this neighbourhood generally get along with each other</li> <li>• People in this neighbourhood share the same values</li> </ul>                                                                                                                                                                                                                                                                                                                    |
| Mujahid et al. (2007) | <ul style="list-style-type: none"> <li>• People around here are willing to help their neighbors</li> <li>• People in my neighbourhood generally get along with each other</li> <li>• People in my neighbourhood can be trusted</li> <li>• People in my neighbourhood share the same values</li> </ul>                                                                                                                                                                                                                                                                                                                                                                         |
| Buckner et al. (1988) | <ul style="list-style-type: none"> <li>• Overall, I am very attracted to living in this neighbourhood</li> <li>• I feel like I belong to this neighbourhood</li> <li>• I visit with my neighbors in their homes</li> <li>• The friendships and associations I have with other people in my neighbourhood mean a lot to me</li> <li>• Given the opportunity, I would like to move out of this neighbourhood</li> <li>• If I needed advice about something I could go to someone in my neighbourhood</li> <li>• I think I agree with most people in my neighbourhood about what is important in life</li> <li>• I believe my neighbors would help me in an emergency</li> </ul> |

|                      |                                                                                                                                                                                                                                                                                                                                                                                                                                                                                                                                                                                                                                                                             |
|----------------------|-----------------------------------------------------------------------------------------------------------------------------------------------------------------------------------------------------------------------------------------------------------------------------------------------------------------------------------------------------------------------------------------------------------------------------------------------------------------------------------------------------------------------------------------------------------------------------------------------------------------------------------------------------------------------------|
|                      | <ul style="list-style-type: none"> <li>• I feel loyal to the people in my neighbourhood</li> <li>• I borrow things and exchange favors with my neighbors</li> <li>• I would be willing to work together with others on something to improve my neighbourhood</li> <li>• I like to think of myself as similar to the people who live in this neighbourhood</li> <li>• I rarely have neighbors over to my house to visit</li> <li>• A feeling of fellowship runs deep between me and other people in this neighbourhood</li> <li>• I regularly stop and talk with people in my neighbourhood</li> <li>• Living in this neighbourhood gives me a sense of community</li> </ul> |
| Friche et al. (2012) | <ul style="list-style-type: none"> <li>• Neighbors who would give advice if something bad happens</li> <li>• Neighbors who would help financially</li> <li>• Neighbors who would inform about an interesting opportunity of job</li> <li>• People that you trust to leave the keys</li> <li>• People that you trust to leave a family member in case of emergency</li> <li>• People that you trust to lend things</li> </ul>                                                                                                                                                                                                                                                |
| Janosz et al. (1998) | <ul style="list-style-type: none"> <li>• Relationship between students</li> <li>• Relationship between students and teachers</li> <li>• Education, security, Justice, Equity</li> <li>• Staff members treat all students the same</li> <li>• Membership and Belonging</li> </ul>                                                                                                                                                                                                                                                                                                                                                                                            |
| Morata et al. (2003) | <ul style="list-style-type: none"> <li>• Quality of life in the neighbourhood</li> </ul>                                                                                                                                                                                                                                                                                                                                                                                                                                                                                                                                                                                    |

|                             |                                                                                                                                                                                                                                                                                                                                                        |
|-----------------------------|--------------------------------------------------------------------------------------------------------------------------------------------------------------------------------------------------------------------------------------------------------------------------------------------------------------------------------------------------------|
|                             | <ul style="list-style-type: none"> <li>• Feeling of security</li> <li>• Feeling that there are common projects and concerns in the neighbourhood</li> <li>• Knowledge about available sociocultural and leisure activities in the neighbourhood</li> <li>• Rating of the leadership of the neighbourhood organisations for the common good</li> </ul>  |
| Liu et al. (2020)           | <ul style="list-style-type: none"> <li>• How many people in the neighbourhood do you know well enough to talk with</li> <li>• How do you rate social relations with your neighbors</li> </ul>                                                                                                                                                          |
| Yuma-Guerrero et al. (2017) | <ul style="list-style-type: none"> <li>• Respondents feel at home in their neighbourhood</li> <li>• Their neighbors are willing to help one another</li> <li>• Their neighbors feel connected to each other</li> <li>• Their neighbors get along</li> <li>• Their neighbors share the same values</li> <li>• Their neighbors can be trusted</li> </ul> |
| De Souza Moreira (2021)     | <ul style="list-style-type: none"> <li>• Do you believe you can trust most people in your neighbourhood?</li> </ul>                                                                                                                                                                                                                                    |
| Pabayo et al. (2011)        | <ul style="list-style-type: none"> <li>• Which statement describes your neighbourhood? Most people keep to themselves; don't talk/visit to most people; talk/visit a lot with other people</li> <li>• How many neighbors do you know well enough to visit</li> <li>• How often do you get together with your neighbors</li> </ul>                      |
| Aarts et al. (2010)         | <ul style="list-style-type: none"> <li>• People in the neighbourhood are willing to help each other</li> <li>• The neighbourhood is a tight community</li> </ul>                                                                                                                                                                                       |

|                                                                                                            |                                                                                                                                                                                                                                                                                                                                           |
|------------------------------------------------------------------------------------------------------------|-------------------------------------------------------------------------------------------------------------------------------------------------------------------------------------------------------------------------------------------------------------------------------------------------------------------------------------------|
|                                                                                                            | <ul style="list-style-type: none"> <li>• The people in the neighbourhood can be trusted</li> <li>• In general, people in the neighbourhood get along well</li> <li>• People in the neighbourhood share the same values</li> <li>• There are many children living in the neighbourhood</li> </ul>                                          |
| De Silva et al. (2014)                                                                                     | <ul style="list-style-type: none"> <li>• Good interaction between people in the neighbourhood</li> <li>• Harmony between people in the neighborhood</li> <li>• Respect each other</li> <li>• Free of social disorder/disputes</li> <li>• Helpful people in the neighbourhood</li> <li>• Trustworthy people in the neighborhood</li> </ul> |
| Mendes de Leon et al.<br>(2009) adapted from<br>Balfour et al., Fisher et al.<br>and Sampson et al. (1997) | <ul style="list-style-type: none"> <li>• Do you know them by name</li> <li>• Neighbors with whom you can talk friendly</li> <li>• Neighbors take care of each other</li> <li>• Neighbors and friends talking outside</li> <li>• 2 additional items</li> </ul>                                                                             |
| Cho et al. (2019)                                                                                          | <ul style="list-style-type: none"> <li>• People in this neighbourhood can be trusted</li> <li>• 4 additional items</li> </ul>                                                                                                                                                                                                             |
| Beenackers et al. (2013)                                                                                   | <ul style="list-style-type: none"> <li>• People can be trusted</li> <li>• Other additional items not available</li> </ul>                                                                                                                                                                                                                 |
